# Supplementary material
Source: publisher figshare collection journal article supplement (https://acs.figshare.com/ndownloader/files/10728667)
Supplement: Supplementary file 1 [file 10728667]

## **Supplementary Material**

for

### **Oxidation of microcystin-LR via activation of peroxymonosulfate using ascorbic acid: Kinetic modeling and toxicity assessment**

Shiqing Zhou,<sup>†,‡</sup> Yanghai Yu,<sup>†</sup> Weiqiu Zhang,<sup>‡</sup> Xiaoyang Meng,<sup>‡</sup> Jinming Luo,<sup>‡</sup> Lin Deng,<sup>†,‡</sup> Zhou

Shi<sup>†</sup> and John Crittenden <sup>\*,‡</sup>

<sup>†</sup> Department of Water Engineering and Science, College of Civil Engineering, Hunan University,

Changsha, Hunan, 410082, China

<sup>‡</sup> Brook Byer Institute for Sustainable Systems and School of Civil and Environmental

Engineering, Georgia Institute of Technology, Atlanta, Georgia 30332, United States

#### **Corresponding Author**

John Crittenden

\*E-mail: [john.crittenden@ce.gatech.edu](mailto:john.crittenden@ce.gatech.edu). Tel.: +1 404 894 5676; fax: +1 404 894 7896

**Submitted to**

**Environmental Science & Technology**

Number of pages (including this page): 23

Number of Text: 7

Number of Tables: 2

Number of Figures: 8

## List of Supporting Information

**Text S1.** Chemicals.

**Text S2.** ESR Procedure for detection of sulfate and hydroxyl radicals.

**Text S3.** ESR Procedure for detection of ascorbyl radicals.

**Text S4.** Toxicity assessment of MCLR and its oxidation products.

**Text S5.** Modeling approach and rate constants determination.

**Text S6.** Kinetic equations.

**Text S7.** Energy costs for H<sub>2</sub>A and PMS production.

**Table S1.** The objective function (OF) values for the kinetic model of MCLR degradation in the H<sub>2</sub>A/PMS process.

**Table S2.** Oxidation products of MCLR identified by LC/MS/MS.

**Figure S1.** The calibration curve by plotting standards absorbance at 405 nm and concentration of MCLR (0.25-2.5 ug/L).

**Figure S2.** Proposed activated mechanism of PMS by ascorbic acid.

**Figure S3.** Model-predicted peroxymonosulfate radical (SO<sub>5</sub><sup>•-</sup>) concentrations during the H<sub>2</sub>A/PMS process.

**Figure S4.** Intensity profiles of hydroxyl radical, sulfate radical and ascorbyl radical during the H<sub>2</sub>A/PMS process.

**Figure S5.** Fractions of H<sub>2</sub>A, HA<sup>-</sup> and A<sup>2-</sup> species under different pH values.

**Figure S6.** Model-predicted sulfate radical and hydroxyl radical distributions under different NOM concentrations during the H<sub>2</sub>A/PMS process.

**Figure S7.** EE/O<sub>total</sub> (in kWh L<sup>-1</sup>) of H<sub>2</sub>A/PMS process vary with H<sub>2</sub>A (a) and PMS (b) doses.

**Figure S8.** Proposed pathways of MC-LR degradation in the H<sub>2</sub>A/PMS process.

## Text S1 Chemicals

MCLR (>95%) centrifuged from *Microcystis aeruginosa* was purchased from Alexis Biochemicals (Switzerland). HPLC-grade acetonitrile, methanol and formic acid were obtained from Sigma-Aldrich (USA). Peroxymonosulfate (Oxone®,  $\text{KHSO}_5 \cdot 0.5 \text{KHSO}_4 \cdot 0.5 \text{K}_2\text{SO}_4$ ,  $\text{KHSO}_5 \geq 47\%$ ) was provided by Aladdin Co., Ltd. (Shanghai, China). 5,5-dimethyl-1-pyrrolidine N-oxide (DMPO) was obtained from Sigma-Aldrich (USA). Ascorbic acid, sodium hydroxide, sodium thiosulfate, sodium bicarbonate, potassium iodide and sulfuric acid were supplied by Sinopharm Chemical Reagent Co. (China). Suwannee River natural organic matter (NOM) was obtained from International Humic Substances Society (USA).

## **Text S2 ESR Procedure for detection of sulfate and hydroxyl radicals**

The chemical of 5,5-dimethyl-1-pyrrolidine-N-oxide (DMPO) was used as a spin-trapping agent in the ESR experiment. The chemical solutions of DMPO, H<sub>2</sub>A, and PMS were mixed for 15 seconds and immediately transferred into a 200  $\mu$ L capillary tube, which was then inserted into the cavity of the ESR spectrometer (Bruker A300, Germany). The total scanning time of the experiment was 30 minutes. The experiment was performed on the ESR spectrometer under the following conditions: a center field of 3361 Gs, a sweep width of 100 Gs, a microwave frequency of 9.420 GHz, a microwave power of 8.07 mW, a receiver gain of  $4.48 \times 10^4$ , a modulation frequency of 100 KHz, a modulation amplitude of 1.0 Gs, and a sweep time of 30.72 seconds.

### **Text S3 ESR Procedure for detection of ascorbyl radicals**

The ESR experiment for detection of ascorbyl radicals was conducted without any spin-trapping agent. The chemical solutions of H<sub>2</sub>A and PMS were mixed for 15 seconds and immediately transferred into a 200  $\mu$ L capillary tube, which was then inserted into the cavity of the ESR spectrometer (Bruker A300, Germany). The total scanning time of the experiment was 30 minutes. The experiment was performed on the ESR spectrometer under the following conditions: a center field of 3513Gs, a sweep width of 100 Gs, a microwave frequency of 9.846 GHz, a microwave power of 8.08mW, a receiver gain of  $4.48 \times 10^4$ , a modulation frequency of 100 KHz, a modulation amplitude of 1.0 Gs, and a sweep time of 30.72 seconds.

#### **Text S4 Toxicity assessment of MCLR and its oxidation products**

The hepatotoxicities of MCLR and its oxidation products were assessed by the PP2A activity assay using a MicroCystest kit (ZEU Immunotec, Spain). Typically, a calibration curve by plotting standards absorbance at 405 nm and concentration of MCLR (0.25-2.5 ug/L) is available in [Figure S1 \(SI\)](#). Samples were appropriately not within the range of the standard curve, and thus a dilution was made before PP2A analysis.

### Text S5 Modeling approach and rate constants determination

The associated rate constants are generally drawn from the literature when we could find reported values. For the literature reported rate constants, most of them had a wide range. Consequently, the rate constants involving  $H_2A$ ,  $HA^-$  and  $A^{2-}$  were obtained by fitting experimental data.

For model fits, the genetic algorithm (GA) was used to minimize the objective function (OF) and determine the rate constants.

$$OF = \sqrt{\frac{1}{n-1} \sum [(C_{exp} - C_{cal})/C_{exp}]^2} \quad (S1)$$

where  $n$  is the number of data points,  $C_{exp}$  and  $C_{cal}$  are the experimental and calculated concentrations of MCLR, respectively.

The kinetic equations used in the model were derived from the mass balance for a species, A, in a completely mixed batch reactor (CMBR), yielding the following ordinary differential equations (ODEs):<sup>1</sup>

$$\frac{dC_a}{dt} = r_a, \quad C_a|_{t=0} = C_{a0} \quad (S2)$$

Where,  $C_{a0}$  is the initial concentration of species A at time 0,  $C_a$  is the concentration of A at time  $t$ , and  $r_a$  is the overall kinetic rate expression of species A in the reaction system. The backward differentiation formula (BDF) method [i.e., Gear's method]<sup>2</sup> was used to solve all differential equations and obtain the concentration profiles of all species in MATLAB.<sup>3</sup>

### Text S6 Kinetic equations

Based on the reactions in Table 1, the overall kinetic rate expressions can be written for inclusion in equation S2.

$$\begin{aligned}
 \frac{d[SO_4^- \bullet]}{dt} = & k_1[H_2A][HSO_5^-] + k_2[HA^-][HSO_5^-] - k_3[H_2O][SO_4^- \bullet] \\
 & - k_4[H_2O][SO_4^- \bullet] - k_5[[H_2A]][SO_4^- \bullet] - k_6[HA^-][SO_4^- \bullet] \\
 & - k_9[HSO_5^-][SO_4^- \bullet] + k_{10}[HSO_5^-][HO \bullet] - k_{12}[A^- \bullet][SO_4^- \bullet] \\
 & - 2k_{14}[SO_4^- \bullet][SO_4^- \bullet] - k_{15}[SO_5^- \bullet][SO_4^- \bullet] - k_{21}[H_2O_2][SO_4^- \bullet] \\
 & - k_{22}[HO_2 \bullet][SO_4^- \bullet] - k_{23}[HO \bullet][SO_4^- \bullet] - k_{27}[MCLR][SO_4^- \bullet]
 \end{aligned} \tag{S3}$$

$$\begin{aligned}
 \frac{d[OH \bullet]}{dt} = & k_3[H_2O][SO_4^- \bullet] + k_4[H_2O][SO_4^- \bullet] - k_7[H_2A][HO \bullet] - k_8[HA^-][HO \bullet] \\
 & - k_{10}[HSO_5^-][HO \bullet] - k_{13}[A^- \bullet][HO \bullet] - 2k_{16}[HO \bullet][HO \bullet] \\
 & - k_{17}[H_2O_2][HO \bullet] - k_{18}[HO_2 \bullet][HO \bullet] - k_{26}[S_2O_8^{2-}][HO \bullet] \\
 & - k_{28}[MCLR][OH \bullet]
 \end{aligned} \tag{S4}$$

$$\begin{aligned}
 \frac{d[A^- \bullet]}{dt} = & k_1[H_2A][HSO_5^-] + k_2[HA^-][HSO_5^-] + k_5[[H_2A]][SO_4^- \bullet] \\
 & + k_6[HA^-][SO_4^- \bullet] + k_7[H_2A][HO \bullet] + k_8[HA^-][HO \bullet] \\
 & - 2k_{11}[A^- \bullet][A^- \bullet] - k_{12}[A^- \bullet][SO_4^- \bullet] - k_{13}[A^- \bullet][HO \bullet]
 \end{aligned} \tag{S5}$$

$$\begin{aligned}
 \frac{d[SO_5^- \bullet]}{dt} = & k_9[HSO_5^-][SO_4^- \bullet] - k_4[H_2O][SO_4^- \bullet] - k_{15}[SO_5^- \bullet][SO_4^- \bullet] \\
 & - 2k_{24}[SO_5^- \bullet][SO_5^- \bullet] - 2k_{25}[SO_5^- \bullet][SO_5^- \bullet]
 \end{aligned} \tag{S6}$$



$$\begin{aligned}\frac{d[HSO_5^-]}{dt} = & -k_1[H_2A][HSO_5^-] - k_2[HA^-][HSO_5^-] - k_9[HSO_5^-][SO_4^- \bullet] \\ & - k_{10}[HSO_5^-][HO \bullet]\end{aligned}\tag{S7}$$

$$\frac{d[H_2A]}{dt} = -k_1[H_2A][HSO_5^-] - k_5[[H_2A]][SO_4^- \bullet] - k_7[H_2A][HO \bullet]\tag{S8}$$

$$\frac{d[HA^-]}{dt} = -k_2[HA^-][HSO_5^-] - k_6[HA^-][SO_4^- \bullet] - k_8[HA^-][HO \bullet]\tag{S9}$$

$$\begin{aligned}\frac{d[S_2O_8^{2-}]}{dt} = & k_{14}[SO_4^- \bullet][SO_4^- \bullet] + k_{15}[SO_5^- \bullet][SO_4^- \bullet] + k_{24}[SO_5^- \bullet][SO_5^- \bullet] \\ & - k_{26}[S_2O_8^{2-}][HO \bullet]\end{aligned}\tag{S10}$$

$$\begin{aligned}\frac{d[H_2O_2]}{dt} = & k_{16}[HO \bullet][HO \bullet] - k_{17}[H_2O_2][HO \bullet] + 2k_{19}[HO_2 \bullet][HO_2 \bullet] \\ & - k_{20}[H_2O_2][HO_2 \bullet] - k_{21}[H_2O_2][SO_4^- \bullet]\end{aligned}\tag{S11}$$

$$\begin{aligned}\frac{d[HO_2 \bullet]}{dt} = & k_{17}[H_2O_2][HO \bullet] - k_{18}[HO_2 \bullet][HO \bullet] - k_{19}[HO_2 \bullet][HO_2 \bullet] \\ & - k_{20}[H_2O_2][HO_2 \bullet] + k_{21}[H_2O_2][SO_4^- \bullet] - k_{22}[HO_2 \bullet][SO_4^- \bullet]\end{aligned}\tag{S12}$$

$$\frac{d[MCLR]}{dt} = -k_{27}[MCLR][SO_4^- \bullet] - k_{28}[MCLR][HO \bullet]\tag{S13}$$

### **Text S7 Energy costs for H<sub>2</sub>A and PMS production**

The local costs of H<sub>2</sub>A and PMS are estimated to be 2.5 \$ kg<sup>-1</sup> and 3.0 \$ kg<sup>-1</sup>, respectively. And the local electricity cost in Georgia (USA) is 0.065 \$ kWh<sup>-1</sup>. According to the method of Rosenfeldt et al.,<sup>4</sup> the energy costs for H<sub>2</sub>A and PMS production were calculated to be 17.44 and 20.93 kWh lb<sup>-1</sup>, respectively.

H<sub>2</sub>A cost=\$ 2.5 kg<sup>-1</sup>

PMS cost=\$ 3.0 kg<sup>-1</sup>

Local electricity cost = \$ 0.065 kWh<sup>-1</sup>

Energy cost of H<sub>2</sub>A=38.46 kWh kg<sup>-1</sup>=17.44 kWh lb<sup>-1</sup>

Energy cost of PMS=46.15 kWh kg<sup>-1</sup>=20.93 kWh lb<sup>-1</sup>

**Table S1 The objective function (OF) values for the kinetic model of MCLR degradation in the H<sub>2</sub>A/PMS process.**

| Kinetic model      |                              |       |                   | Different solution pH values |                  | In the presence of NOM |                   |
|--------------------|------------------------------|-------|-------------------|------------------------------|------------------|------------------------|-------------------|
| [H <sub>2</sub> A] | OF <sub>H<sub>2</sub>A</sub> | [PMS] | OF <sub>PMS</sub> | pH                           | OF <sub>pH</sub> | NOM                    | OF <sub>NOM</sub> |
| 1                  | 0.09                         | 1     | 0.05              | 4                            | 0.11             | 0                      | 0.11              |
| 2                  | 0.11                         | 2     | 0.10              | 5                            | 0.10             | 1                      | 0.11              |
| 5                  | 0.26                         | 5     | 0.11              | 6                            | 0.10             | 3                      | 0.08              |
| 10                 | 0.06                         | 10    | 0.17              | -                            | -                | 5                      | 0.06              |

The unit of H<sub>2</sub>A and PMS was  $\mu\text{M}$ ; the unit of NOM was  $\text{mg L}^{-1}$ .

**Table S2 Oxidation products of MCLR identified by LC/MS/MS**

| Product No. | Chemical formula<br>[M+H] <sup>+</sup>                          | Structure formula                                                                   | m/z       | RT (min)             | References |
|-------------|-----------------------------------------------------------------|-------------------------------------------------------------------------------------|-----------|----------------------|------------|
| <b>MCLR</b> | C <sub>49</sub> H <sub>75</sub> N <sub>10</sub> O <sub>12</sub> | 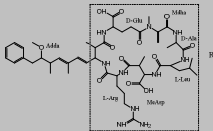   | 995.6000  | 10.177               | -          |
| <b>1</b>    | C <sub>27</sub> H <sub>45</sub> N <sub>8</sub> O <sub>14</sub>  |    | 705.5000  | 19.043               | 5          |
| <b>2</b>    | C <sub>34</sub> H <sub>55</sub> N <sub>10</sub> O <sub>14</sub> |    | 827.5000  | 43.296               | 5          |
| <b>3</b>    | C <sub>37</sub> H <sub>59</sub> N <sub>10</sub> O <sub>13</sub> |    | 851.0000  | 28.301               | 6, 7       |
| <b>4</b>    | C <sub>49</sub> H <sub>73</sub> N <sub>10</sub> O <sub>13</sub> |   | 1009.5000 | 30.660               | 8, 9       |
| <b>5</b>    | C <sub>49</sub> H <sub>75</sub> N <sub>10</sub> O <sub>13</sub> |  | 1011.5000 | 51.573               | 8-12       |
| <b>6</b>    | C <sub>48</sub> H <sub>73</sub> N <sub>10</sub> O <sub>14</sub> |  | 1013.5000 | 0.369,11.609         | 7          |
| <b>7</b>    | C <sub>49</sub> H <sub>75</sub> N <sub>10</sub> O <sub>14</sub> |  | 1027.5000 | 41.087,41.584,43.364 | 8-12       |
| <b>8</b>    | C <sub>49</sub> H <sub>77</sub> N <sub>10</sub> O <sub>14</sub> |  | 1029.5000 | 20.355               | 5          |
| <b>9</b>    | C <sub>48</sub> H <sub>73</sub> N <sub>10</sub> O <sub>15</sub> |  | 1029.5000 | 20.355               | 7          |
| <b>10</b>   | C <sub>49</sub> H <sub>75</sub> N <sub>10</sub> O <sub>15</sub> |  | 1042.5000 | 6.641,36.428         | 5          |

|           |                            |                                                                                   |           |        |               |
|-----------|----------------------------|-----------------------------------------------------------------------------------|-----------|--------|---------------|
| <b>11</b> | $C_{49}H_{78}N_{10}O_{15}$ | 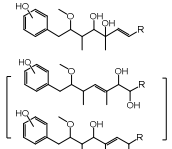 | 1045.5000 | 3.520  | 5             |
| <b>12</b> | $C_{48}H_{73}N_{10}O_{16}$ |  | 1045.5000 | 3.520  | 7             |
| <b>13</b> | $C_{49}H_{75}N_{10}O_{16}$ |  | 1058.5000 | 54.612 | No literature |

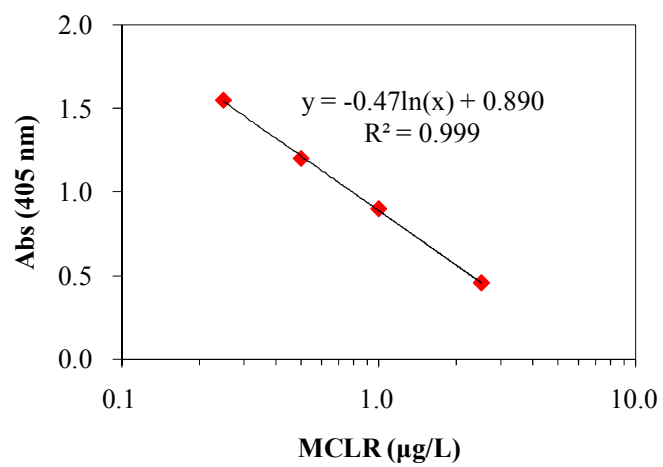

Figure S1 The calibration curve by plotting standards absorbance at 405 nm and concentration of MCLR (0.25-2.5 ug/L).

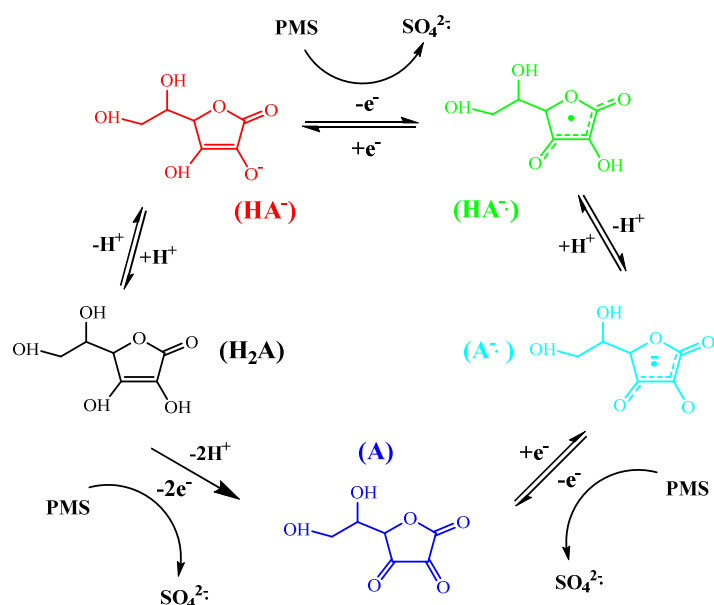

Figure S2 Proposed activated mechanism of PMS by ascorbic acid. Typically, ascorbic acid ( $H_2A$ ) has two ionizable  $-OH$  groups, and a dissociation constant in water of  $7.94 \times 10^{-5}$  ( $pK_a=4.2$ ). At neutral pH, the ascorbate monoanion ( $HA^-$ ) is the dominant species.  $HA^-$  can donate one electron to produce semidehydroascorbate radical, which is oxidized to form the ascorbyl radical ( $A^{\bullet-}$ ). At the same time, PMS can receive the donated one electron and generate  $SO_4^{\bullet-}$ , and partial  $SO_4^{\bullet-}$  can further react with  $OH^-$  or  $H_2O$  to produce  $HO^{\bullet}$ . Then, the ascorbyl radical can donate another electron to produce dehydroascorbic acid ( $A$ ) and also activate PMS to generate  $SO_4^{\bullet-}$ . The dehydroascorbic acid is unstable and breaks down rapidly into diketo-L-gulonic acid, which ultimately produces oxalic and L-threonic acids<sup>13</sup>. Meanwhile, ascorbic acid ( $H_2A$ ) can also directly donate two electrons to produce dehydroascorbic acid ( $A$ ) and activate PMS to generate  $SO_4^{\bullet-}$ .

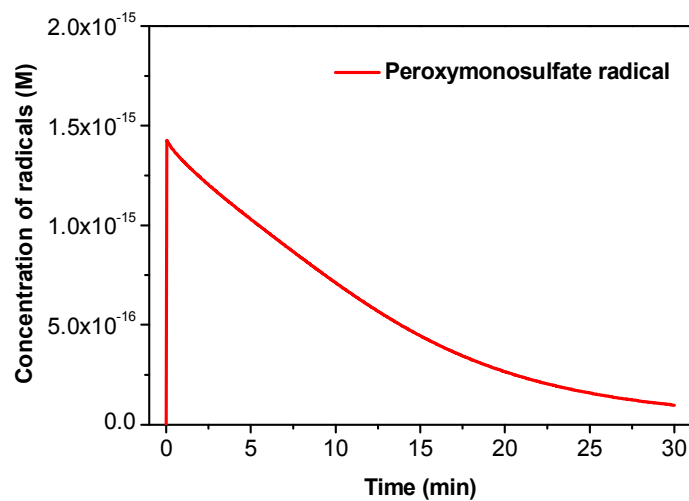

Figure S3 Model-predicted peroxymonosulfate radical (SO<sub>5</sub>•-) concentrations during the H<sub>2</sub>A/PMS process. Conditions: H<sub>2</sub>A = 2.0 × 10<sup>-6</sup> M, PMS = 5.0 × 10<sup>-6</sup> M, and pH<sub>0</sub> = 4.0.



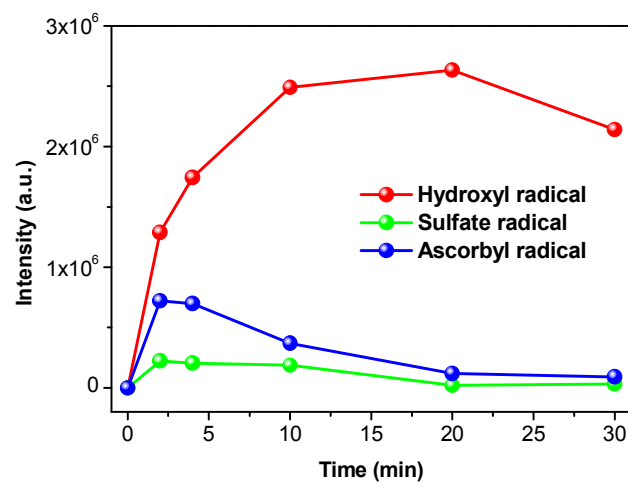

Figure S4 Intensity profiles of hydroxyl radical, sulfate radical and ascorbyl radical during the H<sub>2</sub>A/PMS process.

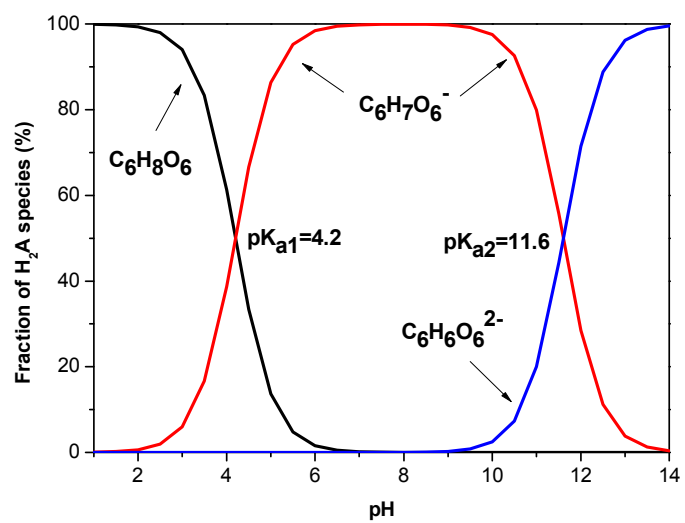

Figure S5 Fractions of H<sub>2</sub>A, HA<sup>-</sup> and A<sup>2-</sup> species under different pH values.

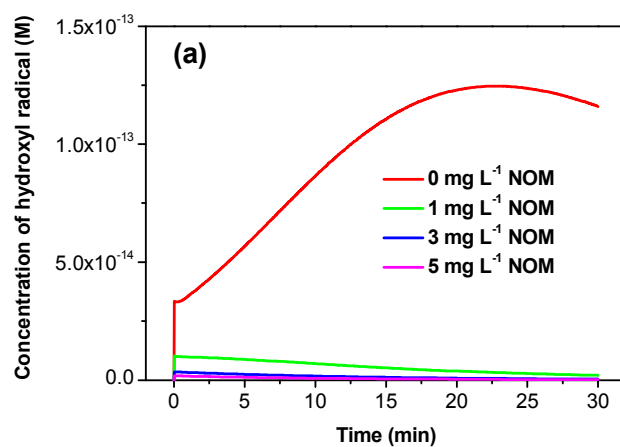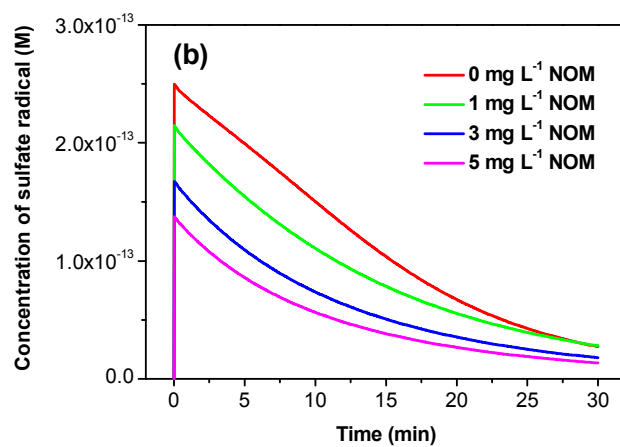

Figure S6 Model-predicted sulfate radical and hydroxyl radical distributions under different NOM concentrations during the H<sub>2</sub>A/PMS process. Conditions: [MCLR]<sub>0</sub> = 2.0 × 10<sup>-7</sup> M, H<sub>2</sub>A = 2.0 × 10<sup>-6</sup> M, PMS = 5.0 × 10<sup>-6</sup> M, and pH<sub>0</sub> = 4.0.

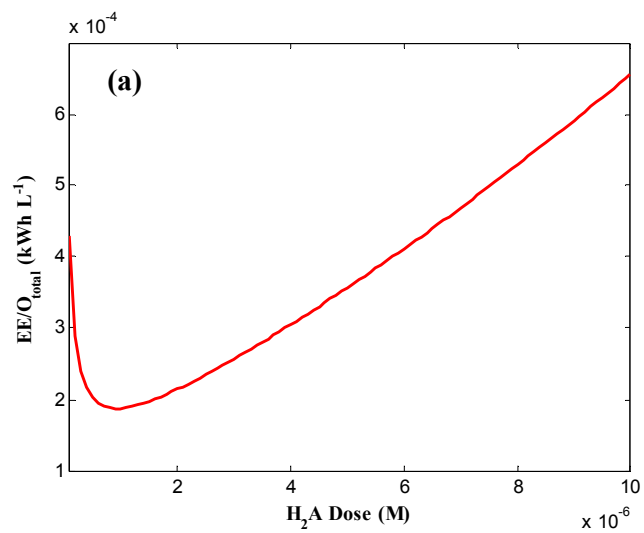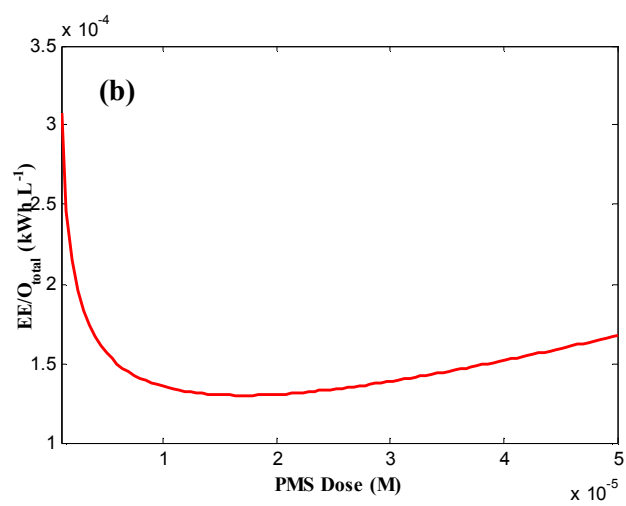

Figure S7  $\text{EE}/\text{O}_{\text{total}}$  (in  $\text{kWh L}^{-1}$ ) of  $\text{H}_2\text{A}/\text{PMS}$  process vary with  $\text{H}_2\text{A}$  (a) and PMS (b) doses. Conditions:  $[\text{MCLR}]_0 = 2.0 \times 10^{-7}$  M,  $\text{H}_2\text{A} = 1.0 \times 10^{-7}$ - $1.0 \times 10^{-5}$  M,  $\text{PMS} = 1.0 \times 10^{-6}$ - $5 \times 10^{-5}$  M, and  $\text{pH}_0 = 4.0$ .

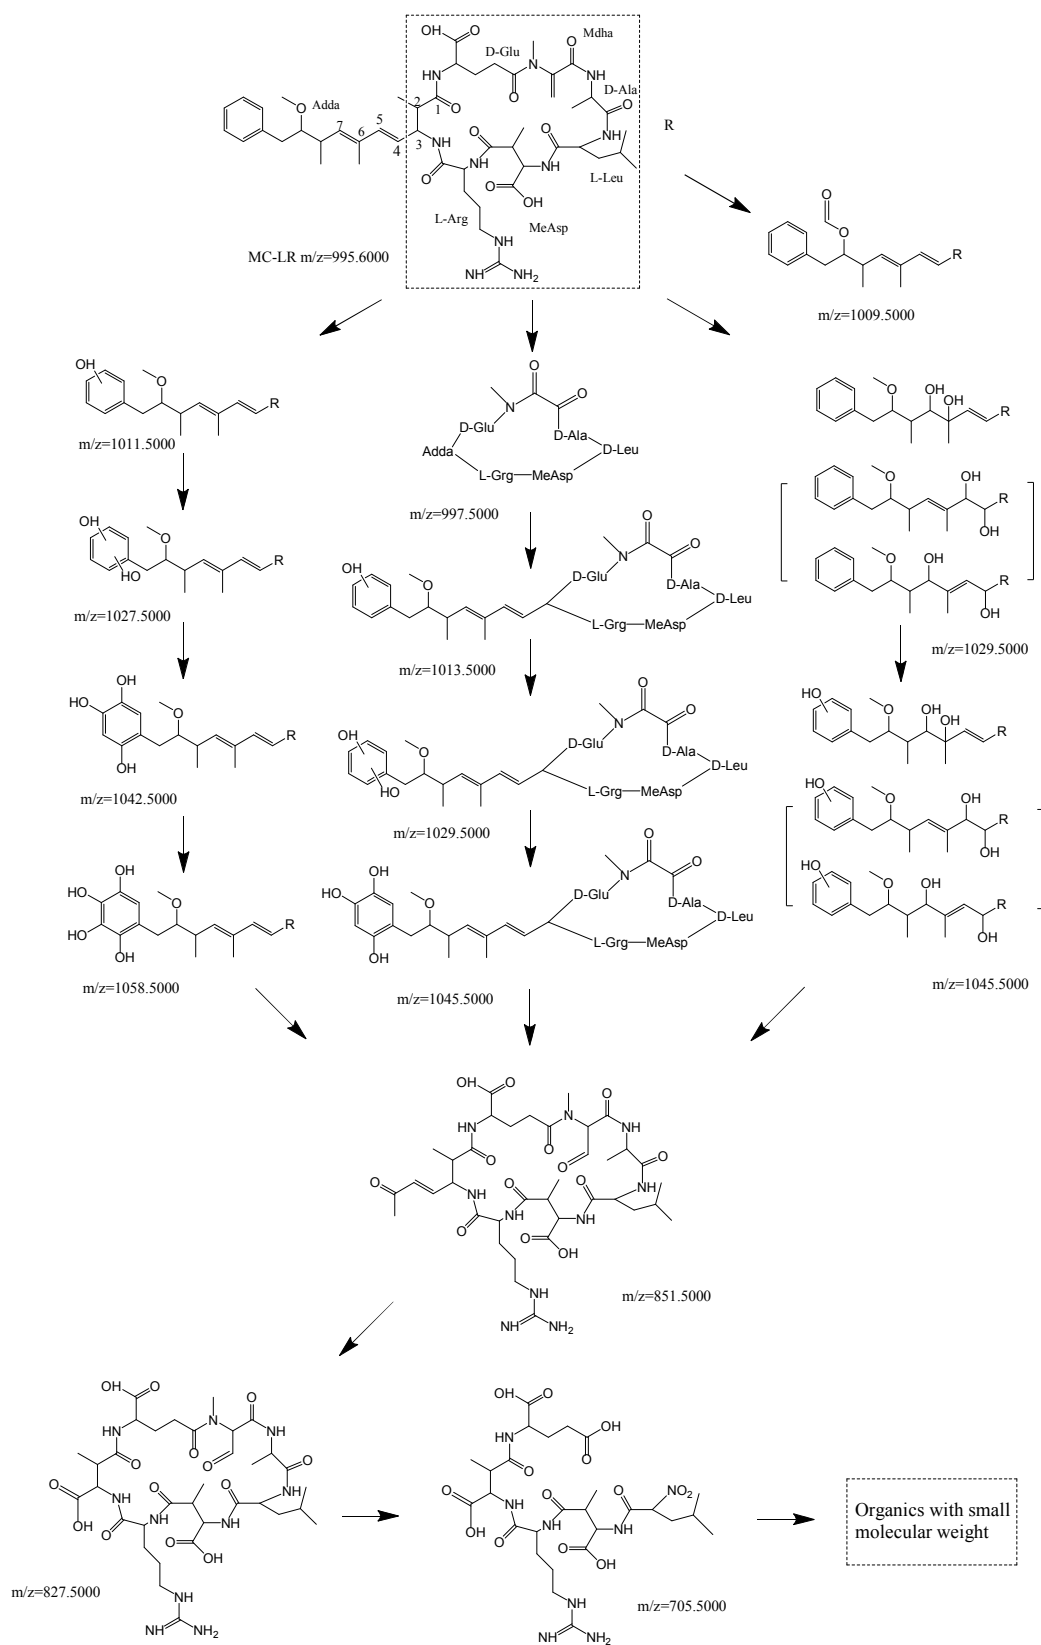

Figure S8 Proposed pathways of MC-LR degradation in the  $H_2A/PMS$  process.

## Reference

- (1) Crittenden, J. C.; Hu, S.; Hand, D. W.; Green, S. A., A kinetic model for H<sub>2</sub>O<sub>2</sub>/UV process in a completely mixed batch reactor. *Water Res.* **1999**, *33* (10), 2315-2328.
- (2) Gear, C. W.; Petzold, L. R., ODE methods for the solution of differential/algebraic systems. *SIAM J. Numer. Anal.* **1984**, *21* (4), 716-728.
- (3) Qian, Y.; Guo, X.; Zhang, Y.; Peng, Y.; Sun, P.; Huang, C.-H.; Niu, J.; Zhou, X.; Crittenden, J. C., Perfluorooctanoic Acid Degradation Using UV–Persulfate Process: Modeling of the Degradation and Chlorate Formation. *Environ. Sci. Technol.* **2015**, *50* (2), 772-781.
- (4) Rosenfeldt, E. J.; Linden, K. G.; Canonica, S.; Von Gunten, U., Comparison of the efficiency of OH radical formation during ozonation and the advanced oxidation processes O<sub>3</sub>/H<sub>2</sub>O<sub>2</sub> and UV/H<sub>2</sub>O<sub>2</sub>. *Water Res.* **2006**, *40* (20), 3695-3704.
- (5) Zhou, S.; Bu, L.; Yu, Y.; Zou, X.; Zhang, Y., A comparative study of microcystin-LR degradation by electrogenerated oxidants at BDD and MMO anodes. *Chemosphere* **2016**, *165*, 381-387.
- (6) Fang, Y.; Zhang, Y.; Ma, W.; Johnson, D. M.; Huang, Y.-p., Degradation of microcystin-LR in water: hydrolysis of peptide bonds catalyzed by maghemite under visible light. *Appl. Catal. B: Environ.* **2014**, *160*, 597-605.
- (7) Kim, M. S.; Kim, H.-H.; Lee, K.-M.; Lee, H.-J.; Lee, C., Oxidation of microcystin-LR by ferrous-tetrapolyphosphate in the presence of oxygen and hydrogen peroxide. *Water Res.* **2017**, *114*, 277-285.
- (8) Antoniou, M. G.; Shoemaker, J. A.; Cruz, A. A. d. l.; Dionysiou, D. D., Unveiling new degradation intermediates/pathways from the photocatalytic degradation of microcystin-LR. *Environ. Sci. Technol.* **2008**, *42* (23), 8877-8883.

- (9) Yanfen, F.; Yingping, H.; Jing, Y.; Pan, W.; Genwei, C., Unique ability of BiOBr to decarboxylate D-Glu and D-MeAsp in the photocatalytic degradation of microcystin-LR in water. *Environ. Sci. Technol.* **2011**, *45* (4), 1593-1600.
- (10) Antoniou, M. G.; de la Cruz, A. A.; Dionysiou, D. D., Intermediates and reaction pathways from the degradation of microcystin-LR with sulfate radicals. *Environ. Sci. Technol.* **2010**, *44* (19), 7238-7244.
- (11) Jiang, W.; Chen, L.; Batchu, S. R.; Gardinali, P. R.; Jasa, L.; Marsalek, B.; Zboril, R.; Dionysiou, D. D.; O' Shea, K. E.; Sharma, V. K., Oxidation of microcystin-LR by ferrate (VI): kinetics, degradation pathways, and toxicity assessments. *Environ. Sci. Technol.* **2014**, *48* (20), 12164-12172.
- (12) He, X.; Armah, A.; Hiskia, A.; Kaloudis, T.; O'Shea, K.; Dionysiou, D. D., Destruction of microcystins (cyanotoxins) by UV-254 nm-based direct photolysis and advanced oxidation processes (AOPs): Influence of variable amino acids on the degradation kinetics and reaction mechanisms. *Water Res.* **2015**, *74*, 227-238.
- (13) Nappi, A. J.; Vass, E., Hydroxyl radical production by ascorbate and hydrogen peroxide. *Neurotox. Res.* **2000**, *2* (4), 343-355.
